# Supplementary material for: Assessing the HIV Care Continuum in Latin America: progress in clinical retention, cART use and viral suppression
Source: PubMed Central journal article supplement (PMC4827101; doi:10.7448/ias.19.1.20636), 2016-04-08

**Supplementary Figure 1.** Attrition from the source population of 22,045 CCASAnet patients in clinical care from 2003-2014 due to various exclusion criteria, resulting in the final study population for three HIV Continuum of Care outcomes: retention, cART use, and viral suppression.

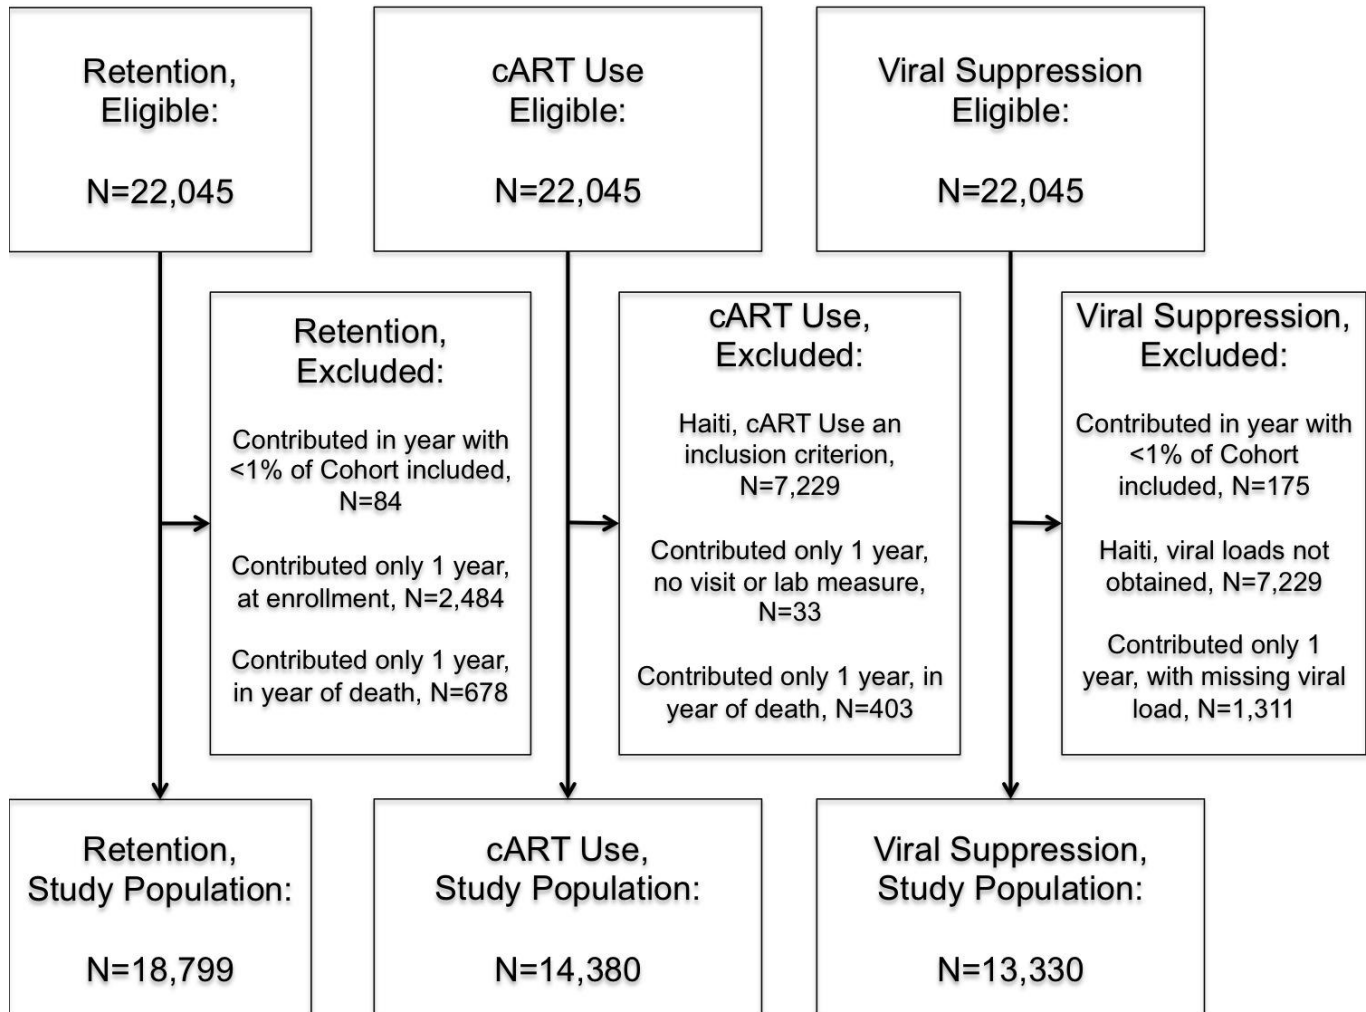

Supplement: JIAS-19-20636-s001.pdf [file JIAS-19-20636-s001.pdf]
